# Supplementary material for: Impact of COVID-19 on patients treated with autologous hematopoietic stem cell transplantation: A retrospective cohort study
Source: PubMed Central journal article supplement (PMC9447418; doi:10.48101/ujms.v127.8611), 2022-08-25
Supplement: UJMS-127-8611-s001.pdf [file UJMS-127-8611-s001.pdf]

## SUPPLEMENT 1. SECONDARY ENDPOINTS

### Level of supportive care

- Need for and duration of hospitalization
- Need for and duration of oxygen treatment
- Need for and duration of high-flow oxygen therapy or non-invasive ventilation
- Need for and duration of intensive care
- Need for and duration of invasive mechanical ventilation or ECMO

### Occurrence of complications

- Acute respiratory distress syndrome (ARDS)
- Arterial and venous thrombosis
- Verified arrhythmias
- Acute cardiac injury
- Stroke
- Secondary infection
- Cytokine release syndrome (CRS)

### Any significant risk factor for severe outcome

- Comorbidities<sup>†</sup>
- Underlying disease including status of disease
- Previous disease modifying treatment in the last six months
- Conditioning regimen
- Age and gender
- Time in relation to ASCT
- Neutropenia
- Laboratory risk factors<sup>‡</sup>

<sup>†</sup>Comorbidities included cardiovascular disease, diabetes mellitus type I and II, hypertension, chronic lung disease, chronic kidney disease, stroke, chronic liver disease, previous organ or allogeneic/autologous hematopoietic stem cell transplantation, other active cancer, obesity and smoking). <sup>‡</sup>Laboratory risk factors included elevated C-reactive protein, low leukocyte counts, low lymphocyte count, elevated liver enzymes above normal, lactate dehydrogenase, ferritin, d-dimer, activated partial thromboplastin time (aPTT), troponin and creatinine.
